# Supplementary material
Source: PubMed Central journal article supplement (PMC6709478)
Supplement: AAC.00449-19-s0001.pdf [file AAC.00449-19-s0001.pdf]

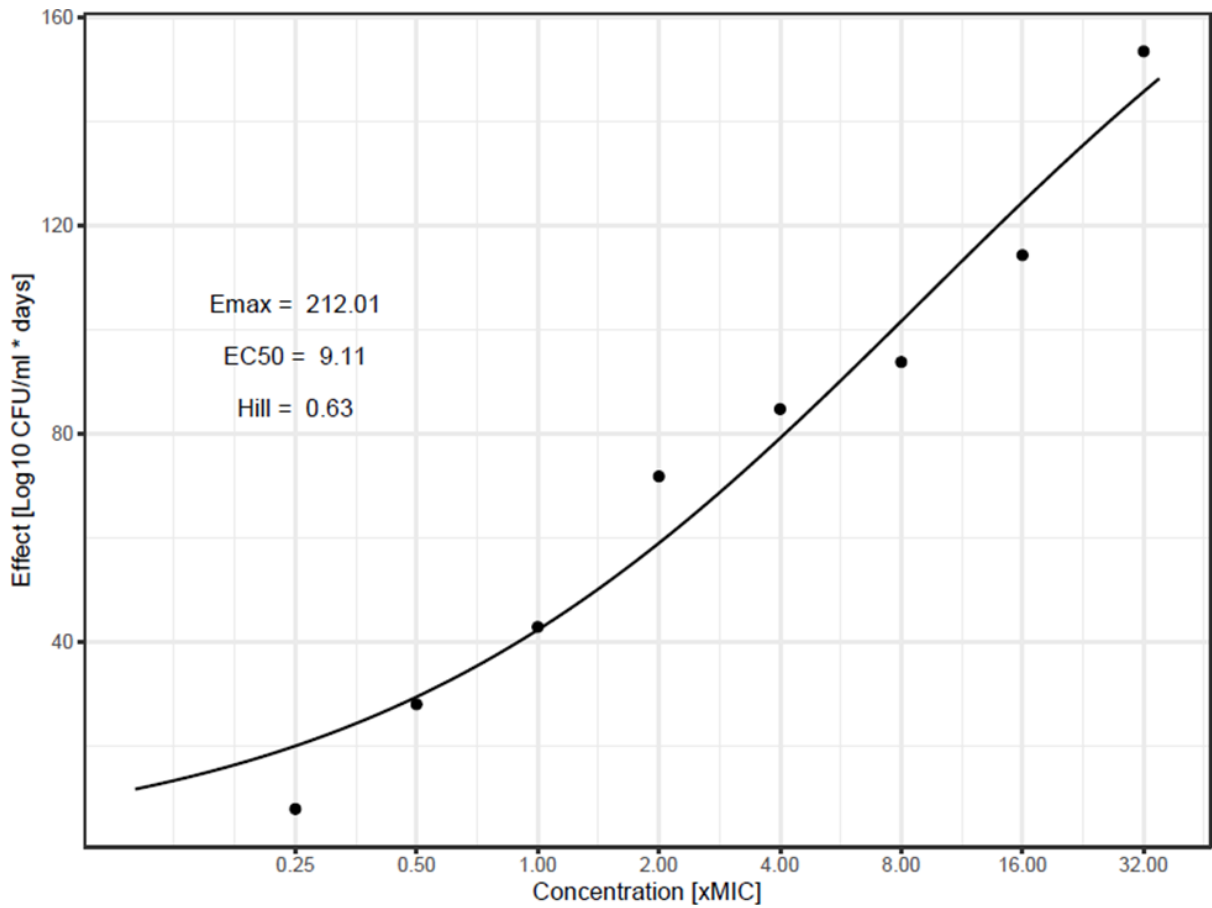

Figure S1: Sigmoidal E<sub>max</sub> curve for auranofin on *M. abscessus*. The fitted E<sub>max</sub> was 212.01 log<sub>10</sub> cfu/mL\*day, the EC<sub>50</sub> was 9.11x MIC and the estimated Hill slope was 0.63.

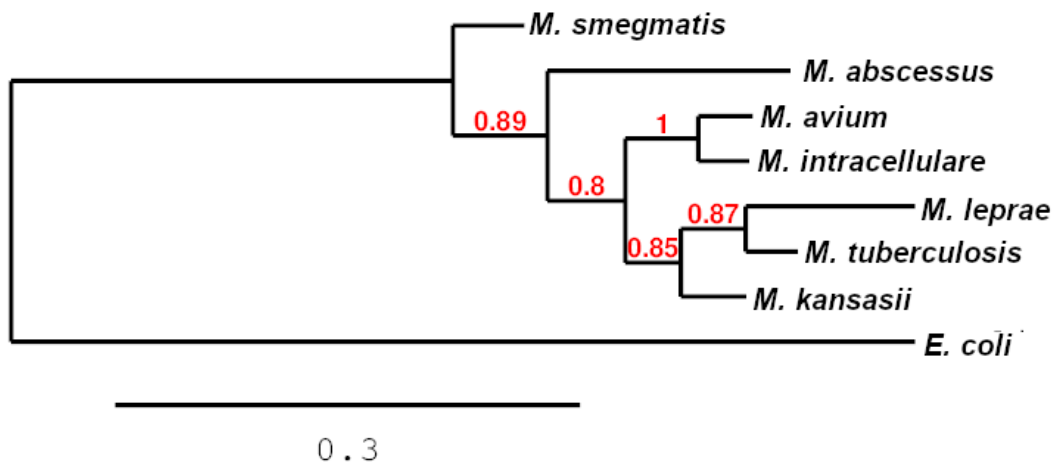

Figure S2: The calculated phylogeny tree for orthologs of TRX in different species of NTM, *M. leprae* and *M. tuberculosis*, as well as *E. coli*.
